# Supplementary material for: A new diphosphate Ba2LiGa(P2O7)2: synthesis, crystal structure and Eu3+-activated fluorescence performance
Source: Royal Society of Chemistry journal article supplement (doi:10.1039/c9dt03105g), 2019-01-01
Supplement: c9dt03105g2.pdf [file c9dt03105g2.pdf]

Table S1. Fractional atomic coordinates and isotropic or equivalent isotropic displacement parameters ( $\text{\AA}^2$ ) of  $\text{Ba}_2\text{LiGa}(\text{P}_2\text{O}_7)_2$

|     | <i>x</i>    | <i>y</i>    | <i>z</i>      | $U_{\text{iso}}^*/U_{\text{eq}}$ |
|-----|-------------|-------------|---------------|----------------------------------|
| Li1 | 0.3793 (19) | 0.0992 (18) | 0.3250 (16)   | 0.026 (3)                        |
| Ba1 | 0.91307 (5) | 0.01699 (5) | 0.21993 (4)   | 0.00840 (12)                     |
| Ba2 | 0.07552 (5) | 0.51094 (5) | 0.26200 (4)   | 0.00956 (12)                     |
| Ga1 | 0.60706 (9) | 0.43480 (9) | 0.23717 (8)   | 0.00584 (17)                     |
| P1  | 0.8171 (2)  | 0.2192 (2)  | 0.51212 (18)  | 0.0066 (3)                       |
| P2  | 0.4407 (2)  | 0.2797 (2)  | 0.57618 (18)  | 0.0061 (3)                       |
| P3  | 0.7778 (2)  | 0.7261 (2)  | -0.00288 (18) | 0.0060 (3)                       |
| P4  | 0.4009 (2)  | 0.7462 (2)  | 0.02820 (19)  | 0.0065 (3)                       |
| O1  | 0.8168 (6)  | 0.0377 (6)  | 0.5601 (5)    | 0.0108 (10)                      |
| O2  | 0.8061 (6)  | 0.2911 (6)  | 0.3368 (5)    | 0.0089 (10)                      |
| O3  | 0.9713 (6)  | 0.2829 (6)  | 0.5579 (5)    | 0.0096 (10)                      |
| O4  | 0.6424 (6)  | 0.2992 (6)  | 0.5942 (5)    | 0.0071 (9)                       |
| O5  | 0.4071 (6)  | 0.1036 (6)  | 0.6448 (5)    | 0.0110 (10)                      |
| O6  | 0.3333 (6)  | 0.4031 (6)  | 0.6539 (5)    | 0.0085 (10)                      |
| O7  | 0.4271 (6)  | 0.3305 (6)  | 0.4009 (5)    | 0.0092 (10)                      |
| O8  | 0.7813 (6)  | 0.5380 (5)  | 0.0695 (5)    | 0.0078 (9)                       |
| O9  | 0.9091 (6)  | 0.7926 (6)  | 0.0648 (5)    | 0.0105 (10)                      |
| O10 | 0.8077 (6)  | 0.7673 (6)  | -0.1755 (5)   | 0.0104 (10)                      |
| O11 | 0.5835 (6)  | 0.8115 (6)  | 0.0383 (5)    | 0.0080 (9)                       |
| O12 | 0.4111 (6)  | 0.5698 (6)  | 0.1368 (5)    | 0.0081 (10)                      |
| O13 | 0.2474 (6)  | 0.8549 (6)  | 0.0744 (5)    | 0.0114 (10)                      |
| O14 | 0.4042 (6)  | 0.7420 (6)  | -0.1399 (5)   | 0.0105 (10)                      |

Table S2. Atomic displacement parameters ( $\text{\AA}^2$ ) of compound  $\text{Ba}_2\text{LiGa}(\text{P}_2\text{O}_7)_2$

|     | $U^{11}$   | $U^{22}$   | $U^{33}$   | $U^{12}$      | $U^{13}$      | $U^{23}$      |
|-----|------------|------------|------------|---------------|---------------|---------------|
| Li1 | 0.023 (8)  | 0.023 (8)  | 0.025 (7)  | -0.009 (6)    | -0.006 (6)    | 0.010 (6)     |
| Ba1 | 0.0089 (2) | 0.0074 (2) | 0.0092 (2) | -0.00092 (15) | -0.00205 (15) | -0.00226 (15) |
| Ba2 | 0.0088 (2) | 0.0097 (2) | 0.0110 (2) | -0.00171 (15) | -0.00063 (15) | -0.00385 (15) |
| Ga1 | 0.0051 (4) | 0.0060 (4) | 0.0059 (3) | -0.0008 (3)   | -0.0017 (3)   | -0.0001 (3)   |
| P1  | 0.0064 (8) | 0.0072 (8) | 0.0055 (8) | 0.0002 (6)    | -0.0007 (6)   | -0.0009 (6)   |
| P2  | 0.0057 (8) | 0.0062 (8) | 0.0065 (8) | -0.0016 (6)   | -0.0008 (6)   | -0.0013 (6)   |
| P3  | 0.0049 (8) | 0.0064 (8) | 0.0068 (8) | -0.0008 (6)   | -0.0004 (6)   | -0.0021 (6)   |
| P4  | 0.0060 (8) | 0.0064 (8) | 0.0067 (8) | -0.0010 (6)   | -0.0029 (6)   | 0.0000 (6)    |
| O1  | 0.013 (3)  | 0.007 (2)  | 0.012 (2)  | -0.0018 (19)  | 0.0007 (19)   | -0.0034 (19)  |
| O2  | 0.009 (2)  | 0.014 (3)  | 0.005 (2)  | 0.001 (2)     | -0.0035 (18)  | -0.0036 (18)  |
| O3  | 0.009 (2)  | 0.012 (2)  | 0.009 (2)  | -0.0052 (19)  | -0.0054 (18)  | -0.0015 (19)  |
| O4  | 0.004 (2)  | 0.013 (2)  | 0.004 (2)  | 0.0000 (18)   | -0.0029 (17)  | -0.0019 (18)  |
| O5  | 0.012 (3)  | 0.003 (2)  | 0.017 (2)  | -0.0004 (19)  | 0.000 (2)     | -0.0023 (19)  |

|     |           |           |           |              |              |              |
|-----|-----------|-----------|-----------|--------------|--------------|--------------|
| O6  | 0.011 (3) | 0.007 (2) | 0.008 (2) | 0.0009 (19)  | 0.0005 (18)  | -0.0033 (18) |
| O7  | 0.009 (2) | 0.014 (2) | 0.007 (2) | -0.004 (2)   | 0.0005 (18)  | -0.0046 (19) |
| O8  | 0.009 (2) | 0.004 (2) | 0.009 (2) | -0.0033 (18) | -0.0012 (18) | 0.0017 (17)  |
| O9  | 0.007 (2) | 0.013 (3) | 0.013 (2) | -0.005 (2)   | 0.0001 (19)  | -0.0047 (19) |
| O10 | 0.010 (3) | 0.010 (2) | 0.010 (2) | -0.0002 (19) | -0.0016 (19) | -0.0021 (19) |
| O11 | 0.008 (2) | 0.008 (2) | 0.009 (2) | 0.0002 (18)  | -0.0030 (18) | -0.0030 (18) |
| O12 | 0.009 (2) | 0.009 (2) | 0.007 (2) | -0.0052 (19) | -0.0016 (18) | 0.0008 (18)  |
| O13 | 0.003 (2) | 0.017 (3) | 0.013 (2) | 0.0019 (19)  | 0.0001 (18)  | -0.004 (2)   |
| O14 | 0.014 (3) | 0.007 (2) | 0.011 (2) | 0.0006 (19)  | -0.0052 (19) | -0.0028 (19) |

Table S3. Selected Interatomic Distances (Å) and Angles (°) of Ba<sub>2</sub>LiGa(P<sub>2</sub>O<sub>7</sub>)<sub>2</sub>

|                                        |            |                       |           |
|----------------------------------------|------------|-----------------------|-----------|
| Li1—O1 <sup>i</sup>                    | 2.021 (13) | Ba2—O8 <sup>ii</sup>  | 3.194 (4) |
| Li1—O10 <sup>ii</sup>                  | 2.088 (15) | Ba2—O13               | 3.299 (4) |
| Li1—O5 <sup>i</sup>                    | 2.177 (16) | Ga1—O12               | 1.914 (5) |
| Li1—O7                                 | 2.355 (15) | Ga1—O2                | 1.956 (5) |
| Li1—O14 <sup>ii</sup>                  | 2.451 (13) | Ga1—O14 <sup>ii</sup> | 1.970 (5) |
| Ba1—O9 <sup>iii</sup>                  | 2.688 (5)  | Ga1—O8                | 1.976 (4) |
| Ba1—O5 <sup>i</sup>                    | 2.782 (4)  | Ga1—O7                | 1.988 (4) |
| Ba1—O2                                 | 2.806 (5)  | Ga1—O6 <sup>vii</sup> | 2.046 (4) |
| Ba1—O3 <sup>iv</sup>                   | 2.879 (5)  | P1—O1                 | 1.482 (5) |
| Ba1—O9 <sup>v</sup>                    | 2.917 (4)  | P1—O3                 | 1.517 (4) |
| Ba1—O10 <sup>v</sup>                   | 2.926 (4)  | P1—O2                 | 1.551 (4) |
| Ba1—O13 <sup>ii</sup>                  | 2.955 (4)  | P1—O4                 | 1.599 (5) |
| Ba1—O14 <sup>ii</sup>                  | 2.962 (5)  | P2—O5                 | 1.496 (5) |
| Ba1—O1 <sup>iv</sup>                   | 2.967 (5)  | P2—O6                 | 1.514 (5) |
| Ba1—O13 <sup>vi</sup>                  | 3.044 (5)  | P2—O7                 | 1.547 (4) |
| Ba1—O1                                 | 3.140 (5)  | P2—O4                 | 1.607 (4) |
| Ba2—O3 <sup>vii</sup>                  | 2.685 (5)  | P3—O9                 | 1.496 (4) |
| Ba2—O10 <sup>ii</sup>                  | 2.699 (5)  | P3—O10                | 1.505 (5) |
| Ba2—O12                                | 2.714 (4)  | P3—O8                 | 1.547 (4) |
| Ba2—O9 <sup>viii</sup>                 | 2.806 (5)  | P3—O11                | 1.599 (5) |
| Ba2—O2 <sup>viii</sup>                 | 2.866 (4)  | P4—O13                | 1.475 (5) |
| Ba2—O3 <sup>viii</sup>                 | 2.928 (4)  | P4—O14                | 1.541 (5) |
| Ba2—O8 <sup>viii</sup>                 | 2.977 (4)  | P4—O12                | 1.544 (5) |
| Ba2—O7                                 | 3.125 (5)  | P4—O11                | 1.597 (5) |
| Ba2—O6 <sup>ix</sup>                   | 3.139 (5)  |                       |           |
|                                        |            |                       |           |
| O1 <sup>i</sup> —Li1—O10 <sup>ii</sup> | 86.7 (6)   | O3—P1—O2              | 109.1 (2) |
| O1 <sup>i</sup> —Li1—O5 <sup>i</sup>   | 96.1 (6)   | O1—P1—O4              | 108.3 (3) |
| O10 <sup>ii</sup> —Li1—O5 <sup>i</sup> | 142.9 (8)  | O3—P1—O4              | 105.1 (3) |
| O1 <sup>i</sup> —Li1—O7                | 119.4 (7)  | O2—P1—O4              | 106.3 (3) |
| O10 <sup>ii</sup> —Li1—O7              | 93.7 (6)   | O5—P2—O6              | 115.9 (3) |
| O5 <sup>i</sup> —Li1—O7                | 116.1 (6)  | O5—P2—O7              | 110.5 (3) |

|                                                                                                                                                                                                                                |            |            |           |
|--------------------------------------------------------------------------------------------------------------------------------------------------------------------------------------------------------------------------------|------------|------------|-----------|
| O1 <sup>i</sup> —Li1—O14 <sup>ii</sup>                                                                                                                                                                                         | 168.5 (8)  | O6—P2—O7   | 112.2 (3) |
| O10 <sup>ii</sup> —Li1—O14 <sup>ii</sup>                                                                                                                                                                                       | 85.2 (5)   | O5—P2—O4   | 109.5 (3) |
| O5 <sup>i</sup> —Li1—O14 <sup>ii</sup>                                                                                                                                                                                         | 85.5 (5)   | O6—P2—O4   | 102.8 (3) |
| O7—Li1—O14 <sup>ii</sup>                                                                                                                                                                                                       | 69.4 (4)   | O7—P2—O4   | 105.1 (2) |
| O12—Ga1—O14 <sup>ii</sup>                                                                                                                                                                                                      | 92.74 (19) | O9—P3—O10  | 112.5 (3) |
| O2—Ga1—O14 <sup>ii</sup>                                                                                                                                                                                                       | 85.37 (19) | O9—P3—O8   | 109.9 (3) |
| O12—Ga1—O8                                                                                                                                                                                                                     | 91.95 (18) | O10—P3—O8  | 111.4 (3) |
| O2—Ga1—O8                                                                                                                                                                                                                      | 88.22 (18) | O9—P3—O11  | 108.1 (3) |
| O14 <sup>ii</sup> —Ga1—O8                                                                                                                                                                                                      | 91.34 (19) | O10—P3—O11 | 106.6 (3) |
| O12—Ga1—O7                                                                                                                                                                                                                     | 86.78 (18) | O8—P3—O11  | 108.2 (2) |
| O2—Ga1—O7                                                                                                                                                                                                                      | 93.01 (19) | O13—P4—O14 | 112.3 (3) |
| O14 <sup>ii</sup> —Ga1—O7                                                                                                                                                                                                      | 87.44 (19) | O13—P4—O12 | 112.4 (3) |
| O12—Ga1—O6 <sup>vii</sup>                                                                                                                                                                                                      | 97.68 (19) | O14—P4—O12 | 110.6 (3) |
| O2—Ga1—O6 <sup>vii</sup>                                                                                                                                                                                                       | 84.22 (18) | O13—P4—O11 | 110.6 (3) |
| O1—P1—O3                                                                                                                                                                                                                       | 115.6 (3)  | O14—P4—O11 | 105.7 (2) |
| O1—P1—O2                                                                                                                                                                                                                       | 111.8 (3)  | O12—P4—O11 | 104.8 (2) |
| Symmetry codes: (i) $-x+1, -y, -z+1$ ; (ii) $-x+1, -y+1, -z$ ; (iii) $x, y-1, z$ ; (iv) $-x+2, -y, -z+1$ ; (v) $-x+2, -y+1, -z$ ; (vi) $x+1, y-1, z$ ; (vii) $-x+1, -y+1, -z+1$ ; (viii) $x-1, y, z$ ; (ix) $-x, -y+1, -z+1$ . |            |            |           |
